# Supplementary material for: Synovial Fluid in Knee Osteoarthritis Extends Proinflammatory Niche for Macrophage Polarization
Source: MDPI journal article supplement (doi:10.3390/cells11244115), 2022-12-18
Supplement: s1 [file s1]

**Table S1:** Patient demographic details from whom the SF samples were obtained and used during *in vitro* cell differentiation assay

| Patient No. | KL grade | Age (yrs) | Sex | BMI   |
|-------------|----------|-----------|-----|-------|
| P1          | I        | 53        | M   | 28.1  |
| P2          | I        | 40        | F   | 28.1  |
| P3          | I        | 70        | F   | 25.4  |
| P4          | I        | 65        | M   | 27.5  |
| P5          | II       | 57        | M   | 23.23 |
| P6          | II       | 42        | M   | 31.1  |
| P7          | II       | 52        | M   | 27.34 |
| P8          | II       | 63        | F   | 22.41 |
| P9          | II       | 67        | F   | 26.2  |
| P10         | III      | 31        | M   | 25.21 |
| P11         | III      | 50        | F   | 21.35 |
| P12         | III      | 55        | F   | 20.3  |
| P13         | III      | 55        | F   | 33.6  |
| P14         | III      | 50        | F   | 18.5  |
| P15         | IV       | 75        | F   | 24.63 |
| P16         | IV       | 59        | M   | 21    |
| P17         | IV       | 70        | M   | 23.2  |
| P18         | IV       | 75        | M   | 19.81 |
| P19         | IV       | 59        | M   | 27.1  |
| P20         | IV       | 77        | F   | 25.5  |

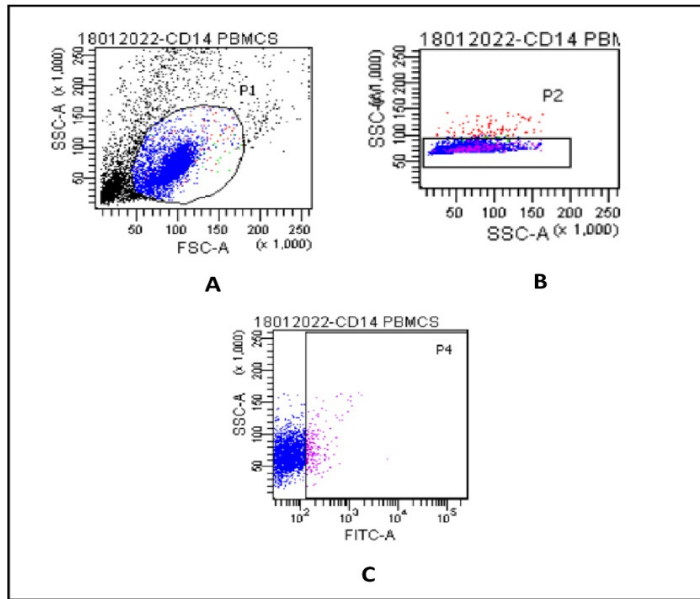

**Figure S1:** Gating and cell sorting strategy to obtain CD14<sup>+</sup> monocytes from PBMCs; for this, freshly isolated PBMCs were stained with CD14 (FITC) and physical parameters, forward scatter (FSC) and side scatter (SSC) were applied to select PBMCs population for sorting as shown in A; B and C represents the gating applied for CD14<sup>+</sup> cell sorting
